# Supplementary material for: Using Bacterial Extract along with Differential Gene Expression in Acropora millepora Larvae to Decouple the Processes of Attachment and Metamorphosis
Source: PubMed Central journal article supplement (PMC3359992; doi:10.1371/journal.pone.0037774), 2012-05-24
Supplement: pone.0037774.s001.pdf [file pone.0037774.s001.pdf]

**Table S1. List of genes employed in the multiplexed RT-qPCR assay 1.**

| Protein name                                         | Acronym          | Accession number                             | Product length | Oligo sequences <sup>a</sup>                        | Function                                                                                                      | References |
|------------------------------------------------------|------------------|----------------------------------------------|----------------|-----------------------------------------------------|---------------------------------------------------------------------------------------------------------------|------------|
| <b>Reference genes</b>                               |                  |                                              |                |                                                     |                                                                                                               |            |
| Glyceraldehyde 3 phosphate dehydrogenase             | <i>Gapdh</i>     | EZ026309                                     | 187            | F: AGGTGGAGCCAAGAAAGTCA<br>R: TTAGCTAGAGGAGCCAGGCA  | Housekeeping gene of demonstrated stable expression level                                                     | [24,26]    |
| Ribosomal protein S7                                 | <i>Rps7</i>      | EZ031290                                     | 197            | F: CAGGCATGCTTACAACCAAA<br>R: TCAACCTCCTTTGCTCCAGT  |                                                                                                               |            |
| Ribosomal protein L9                                 | <i>Rpl9</i>      | EZ026324                                     | 292            | F: CGTGAAACGTTGGTITTC<br>R: TTGACACCTGAATTCGCAC     |                                                                                                               |            |
| Unknown transcript                                   | <i>Ctg1913</i>   | EZ040581                                     | 280            | F: GATTTAACCCACGGCAGTGT<br>R: ATGGTAGGGAGGAGGCTGTT  |                                                                                                               |            |
| <b>Genes of interest</b>                             |                  |                                              |                |                                                     |                                                                                                               |            |
| Toll interleukin receptor                            | <i>TIR-1</i>     | EF090256                                     | 137            | F: AAAGCCGAGTCATCAGTTT<br>R: GAAATTGGCGTTGAATTCGT   | Toll/TLR pathway                                                                                              | [19]       |
| TNF receptor associated factor 6                     | <i>TRAF-6</i>    | DY583189                                     | 127            | F: TGATGAATGCTCTTCGCAG<br>R: ACATGCTTTGCAAGCTGATG   |                                                                                                               |            |
| Mitogen-activated protein kinase/ERK kinase kinase-1 | <i>MEKK-1</i>    | DY581208<br>DY581138<br>DY582675             | 117            | F: CTGCGGATATTGGTCTGT<br>R: TTCTTTGTGGTGTGATCCC     |                                                                                                               |            |
| Extracellular signal regulated kinases               | <i>ERK-2</i>     | EZ025389                                     | 217            | F: CCAAAGTTTACAGCAAGGCT<br>R: TGCGTGCTTTTTCATTCATA  |                                                                                                               |            |
| P38 mitogen-activated protein kinases.               | <i>MAPK-p38</i>  | EZ031759                                     | 237            | F: AAAATCAGCAGTGAATCCGC<br>R: TCGGGTCTGAATACGTAGC   |                                                                                                               |            |
| Part of AP-1 early response transcription factor     | <i>AP-1/cFos</i> | EZ016042                                     | 177            | F: CTGGAAGAGAATTGTGGC<br>R: GACGATGCACTTCGGACTT     |                                                                                                               |            |
| Part of AP-1 early response transcription factor     | <i>AP-1/cJun</i> | EZ020860                                     | 366            | F: TCGATCGAAGGACAGTTCT<br>R: GTGCTAGTTGGTGTTCAA     |                                                                                                               |            |
| c-AMP Activating transcription factor 4              | <i>ATF4/5</i>    | DY577805                                     | 247            | F: GGCCAGAACGTATACCAAT<br>R: TCTTCGAAATCAAACCCCTG   |                                                                                                               |            |
| Nuclear factor kappa B                               | <i>NF-kB</i>     | G0002043<br>DY582971<br>DY580118<br>G0000491 | 152            | F: GATGTTGCAGGCTCAGTTCA<br>R: CTCATATGCAGGTTGGTGG   |                                                                                                               |            |
| TRIF-related adaptor molecule                        | <i>TRAM</i>      | EZ047194                                     | 157            | F: AAGCTAACGGCTCACCAAGA<br>R: TGTGCCATGCACAAGAAAAT  | IFN pathway                                                                                                   | [19]       |
| Apical extracellular protein                         | <i>Apextrin</i>  | EF091848                                     | 352            | F: GGATTCGTACCAAAAAGGCA<br>R: GAGGGTCTGATATGGGGTT   | MAC/PF - membrane attack complex/perforin domain.                                                             | [19]       |
| 60 kDa proteinaceous toxin                           | <i>Tx60-A</i>    | DY579588                                     | 207            | F: TACTGCCCTTGAGGTTTGCT<br>R: CTGAAAATCCCGCTGACTGT  |                                                                                                               |            |
| Complement factor B precursor                        | <i>Bf</i>        | GO001635                                     | 227            | F: TTATCCATCCCGACGTAAC<br>R: AGGATCATCTTTTCCTGCGA   | Alternative pathway of complement activation with 6e-77 on 30% coverage to <i>N. vectensis</i> (AB450042).    | [42]       |
| Complement C3                                        | <i>C3</i>        | EF090257                                     | 167            | F: CCGCTACAGGCTAGACAACA<br>R: CCGCAGAGTCGATGTACAAA  | Alternative pathway of complement activation with 0e-value on 87% coverage to <i>N. vectensis</i> (AB450038). | [42]       |
| Mannose-binding lectin                               | <i>millectin</i> | EU717895                                     | 257            | F: AGCGAGTATCCACAACACCC<br>R: GGCTTTTTCGATGTTTTCCA  | Innate immune system cell surface recognition receptors.                                                      | [15,16,23] |
| C type lectin                                        | <i>CTL-1</i>     | GO001638                                     | 312            | F: GGGTTGTGTACAACGGCTTT<br>R: CTTCCATTGGTTCCTCTG    | Innate immune system cell surface recognition receptors.                                                      | [15,16]    |
| C type lectin                                        | <i>CTL-2</i>     | GS01UH10                                     | 267            | F: CAGGTCCTGGATCCGACTCAT<br>R: CATGTCCAGTGGTTGTACGC |                                                                                                               |            |
| Hemolytic lectin-1                                   | <i>HL-1</i>      | EU863776<br>EU863777                         | 335            | F: TTCGCTCCAGAGGAAACTA<br>R: GCAGAAATGCCTTTGGTGT    | Innate immune system cell surface recognition receptors, member of the CEL-III lectins.                       | [15,16]    |
| Hemolytic lectin-2                                   | <i>HL-2</i>      | EU863776                                     | 302            | F: AACAGTTGAGATAACCGCG<br>R: TTGATTCCTGGTGCATTGA    |                                                                                                               |            |
| Hemolytic lectin-3                                   | <i>HL-3</i>      | EU863777                                     | 379            | F: TTCTGGAGATTGGTAACGC<br>R: TCGTTCTCAGCGTGTGTTC    |                                                                                                               |            |

<sup>a</sup>Forward (AGGTGACACTATAGAATA) and reverse (GTACGACTCACTATAGGGA) fluorescent universal tags, omitted from the oligo sequences in the table, were added at the 5' end of all primers.
