# Supplementary material for: Using Bacterial Extract along with Differential Gene Expression in Acropora millepora Larvae to Decouple the Processes of Attachment and Metamorphosis
Source: PubMed Central journal article supplement (PMC3359992; doi:10.1371/journal.pone.0037774), 2012-05-24
Supplement: pone.0037774.s002.pdf [file pone.0037774.s002.pdf]

**Table S2. List of genes employed in the multiplexed RT-qPCR assay 2.**

| Protein name                                                     | Acronym                    | Accession number | Product length | Oligo sequences <sup>a</sup>                        | Function                                                                                                               | References    |
|------------------------------------------------------------------|----------------------------|------------------|----------------|-----------------------------------------------------|------------------------------------------------------------------------------------------------------------------------|---------------|
| <b>Reference genes</b>                                           |                            |                  |                |                                                     |                                                                                                                        |               |
| Glyceraldehyde 3 phosphate dehydrogenase                         | <i>Gapdh</i>               | EZ026309         | 187            | F: AGGTGGAGCCAAGAAAGTCA<br>R: TTAGCTAGAGGAGCCAGGCA  | Housekeeping gene of demonstrated stable expression level                                                              | [24,26]       |
| Ribosomal protein S7                                             | <i>Rps7</i>                | EZ031290         | 197            | F: CAGGCATGCTTACAACAAA<br>R: TCAACCTCCTTGTCCAGT     |                                                                                                                        |               |
| Ribosomal protein L9                                             | <i>Rpl9</i>                | EZ026324         | 292            | F: CGTGTAAACGTGTGGTTTGC<br>R: TTGACACCTGAATTCGCAC   |                                                                                                                        |               |
| Unknown transcript                                               | <i>Ctg1913</i>             | EZ040581         | 280            | F: GATTTAACCCCGGCAGTGT<br>R: ATGGTAGGGAGGAGGCTGTT   |                                                                                                                        |               |
| Microtubule affinity-regulating kinase 3.                        | <i>Mark3</i>               | EZ011755         | 162            | F: GAGCAGAAGCCGAAACAGC<br>R: AGGCTGCTTAGAGGAGGGTC   | Housekeeping gene of demonstrated stable expression level                                                              | [57]          |
| <b>Genes of interest</b>                                         |                            |                  |                |                                                     |                                                                                                                        |               |
| GTPases hydrolase enzyme                                         | <i>Septin-1</i>            | EZ027858         | 137            | F: TTAACCATTTGGTGGCATGAA<br>R: GTTCCGGTCTTGTTTTGGGA | Cell division and cytokinesis.                                                                                         | [50]          |
| GTPases hydrolase enzyme                                         | <i>Septin-7</i>            | EZ044856         | 157            | F: TTGCGAAGTTTTAGAGCGG<br>R: CCTTCTTGACCGCTCTTCG    |                                                                                                                        |               |
| Leucine-rich repeat-containing protein 59                        | <i>LRRC59</i>              | EZ012188         | 182            | F: CGGCATTACTAAAGCTAGGG<br>R: AGATTGCCAACTCCTGTGG   | Toll/TLR pathway with 3e-50 on 95% coverage to <i>Hydra magnipapillata</i> (XP_002165534.1).                           | [58]          |
| Cyclic AMP-dependent transcription factor ATF-2                  | <i>cAMP/ATF2</i>           | EZ023176         | 202            | F: TGCTAGCAGTCTCCCTCAT<br>R: ACATGGTTCCTGGACTTGG    | Classic Toll/TLR pathway.                                                                                              | [19,44,52,59] |
| Cyclic AMP-dependent transcription factor ATF-4                  | <i>cAMP/ATF4</i>           | EZ013045         | 177            | F: CAAGTGACCTCTCTTCCCA<br>R: AGAGACACATTCGCCAGGTG   |                                                                                                                        |               |
| Cyclic AMP-dependent transcription factor ATF-6                  | <i>cAMP/ATF6</i>           | EZ023811         | 285            | F: GACGAGTGTCTTGGGAAA<br>R: TGCATCGGTGAAGTGTCTCC    |                                                                                                                        |               |
| Tyrosine aminotransferase                                        | <i>tyr-amTase</i>          | GH999932         | 192            | F: TCTTTCATCGGTGATCCAT<br>R: AATGTTCAAGTCCGATAGCC   | Tyrosin aminotransferase with 7e-37 on 85% coverage to <i>N. vectensis</i> (XP_001632576.1)                            | [51,60]       |
| Sodium and chloride-dependent -aminobutyric acid transporter 2   | <i>GABA/GAT-2</i>          | EZ004523         | 152            | F: TGGCCTGGGTGATCTGTTAC<br>R: CCTCGAATCAATAGTCCGT   | Neurotransmitter (facilitates communication between neurons).                                                          | [43-45]       |
| Sodium and chloride-dependent -aminobutyric acid transporter 3   | <i>GABA/GAT-3</i>          | EZ026165         | 207            | F: CCAGGGAGTGAAGTGGAAA<br>R: AAAGCCTTCGATGCCTACAA   |                                                                                                                        |               |
| Vesicular -aminobutyric acid transporter                         | <i>GABA/unc-47</i>         | EZ005918         | 212            | F: TTACCAACGGTTGAGTTGAGC<br>R: TTCGTATTGGCTCTCAGGC  |                                                                                                                        |               |
| Sodium and chloride-dependent -aminobutyric acid transporter ine | <i>GABA/ine</i>            | EZ004722         | 217            | F: CCAAATGCGTGGGATACAG<br>R: CCTTCTCGTTTTTGTGGA     |                                                                                                                        |               |
| NADH-ubiquinone oxidoreductase                                   | <i>NADH-ubiq</i>           | DY585529         | 222            | F: ACTTTGGAAGGCTTCCCTC<br>R: AACAGCCAGACCAATGTGC    | First enzyme of the mitochondrial electron transport chain, associated with proton translocation across the membrane   | [51]          |
| Galactose binding lectin domain, nematogalectin-related          | <i>Lectin/nemga1R1</i>     | EU863779         | 142            | F: TGAAATCAGATGCACCAAGC<br>R: TCGTGCCGTTTATAACCTC   | Innate immune system cell surface recognition receptors.                                                               | [15,16]       |
| Galactose binding lectin domain, nematogalectin-related          | <i>Lectin/nemga1B1</i>     | EU863780         | 227            | F: GCGATGCGATGCTTATTACA<br>R: TCCAATCTCGGCTTACTGG   |                                                                                                                        |               |
| Galactose binding lectin domain, nematogalectin-related          | <i>Lectin/nemga1B2</i>     | EU863778         | 270            | F: ACATGTCCCAAGATTCCAGC<br>R: CCTCTTCTTTCAGCACGTC   |                                                                                                                        |               |
| Serine/Threonine Kinases family DC2                              | <i>Pha-C3</i>              | EZ023480         | 232            | F: GATATGCTTCCTTCACCCA<br>R: GGCTGACACAGAGGGTCTC    | cAMP-dependent protein kinase A with 4e-113 on 90% coverage to <i>Hydroides elegans</i> (AB232160).                    | [52]          |
| Green fluorescent protein                                        | <i>amilGFP</i>             | AY646067         | 147            | F: TAGTGATCATCAAGCCTGCG<br>R: AGGCATGTCTCAGGGTACT   | Fluorescent proteins account for visible coral colour other except brown (photosynthetic pigments of algal symbionts). | [25,29,61]    |
| Cyan fluorescent protein                                         | <i>amilCFP</i>             | AY646070         | 245            | F: GAGGAGTTGCTACAGCCAGC<br>R: CCACCTCCTTCGAGCATAAG  |                                                                                                                        |               |
| Red fluorescent protein                                          | <i>amilRFP</i>             | AY646073         | 172            | F: CCATCCTGGAGAAAATCAT<br>R: CGGGTCAGACTTGTCTTGT    |                                                                                                                        |               |
| Blue chromoprotein                                               | <i>amilCP</i>              | AY646075         | 239            | F: ACGGAAGCATACCAATACC<br>R: GGTCCATTGGGAGGAAAGTT   |                                                                                                                        |               |
| Colourless green fluorescent like protein                        | <i>Colourless GFP-like</i> | AY650288         | 265            | F: CAGCTGGATACACATGGCAC<br>R: CCCCCTTCAATATCCCTGT   |                                                                                                                        |               |
| Cysteine-rich protein                                            | <i>Amgalaxin-like-1</i>    | HM163216         | 167            | F: GTGGCAGGATTCGTACATT<br>R: CCGAAACAGCACTTGTGAGA   | Galaxin-related gene.                                                                                                  | [20]          |
| Small cysteine-rich protein                                      | <i>SCRiP-like</i>          | DY587111         | 250            | F: AGCGACCATAAAGTTCCGAAG<br>R: CATCACTTGTGCTAAGGGCA | Coral development and biomineralization                                                                                | [21]          |
| Small cysteine-rich protein                                      | <i>SCRiP2</i>              | BK006535         | 255            | F: TTGATTTACTGCTGGGCCT<br>R: GGATAGCAGCAGCAGTGGTT   |                                                                                                                        |               |
| Small cysteine-rich protein                                      | <i>SCRiP3</i>              | BK006536         | 260            | F: GTTCGCAAGGGTTCAATCTC<br>R: ATTCTTTGGGCATCACTTG   |                                                                                                                        |               |
| Some actin                                                       | <i>Actin</i>               | DY579126         | 298            | F: ATGAAGTCAAAGCAAGCGT<br>R: ACAGGGACAATACAGCTGG    | Structural filament protein.                                                                                           | [38,62]       |
| Type I heterodimeric integral membrane glycoprotein              | <i>Integrin-alpha1</i>     | EU239371         | 303            | F: TCAAGTTTCCACCCGTAGG<br>R: AGGACCAATTATACGCACCG   | Cell-cell and cell-extracellular matrix adhesion.                                                                      | [64]          |

<sup>a</sup> Forward (AGGTGACACTATAGAATA) and reverse (GTACGACTCACTATAGGGA) fluorescent universal tags, omitted from the oligo sequences in the table, were added at the 5' end of all primers.
